# Supplementary material
Source: PubMed Central journal article supplement (PMC1934388)
Supplement: pgen.0030112.sd002.pdf [file pgen.0030112.sd002.pdf]

| Fragment ID | chromosome | nt_start | nt_stop  | Mn       | t    | p          |
|-------------|------------|----------|----------|----------|------|------------|
| ADH-1075    | chr2L      | 14581295 | 14582196 | 1.99312  | 6.36 | 0.0078509  |
| ADH-1082    | chr2L      | 14588278 | 14589212 | 1.49613  | 4.97 | 0.0156775  |
| ADH-1602    | chr2L      | 15109357 | 15110246 | 1.2463   | 3.19 | 0.0498795  |
| ADH-1926    | chr2L      | 15434332 | 15435254 | 1.47471  | 3.2  | 0.0493698  |
| ADH-1986    | chr2L      | 15494297 | 15495277 | 2.24399  | 7.54 | 0.00484489 |
| ADH-2131    | chr2L      | 15639318 | 15640245 | 1.65744  | 3.86 | 0.0308016  |
| ADH-2233    | chr2L      | 15779140 | 15780087 | 1.40726  | 4.83 | 0.0169044  |
| ADH-2353    | chr2L      | 15900287 | 15901211 | 0.536932 | 5.09 | 0.0146659  |
| ADH-2734    | chr2L      | 16282721 | 16283590 | 1.10872  | 7.28 | 0.0053501  |
| ADH-2735    | chr2L      | 16283737 | 16284648 | 2.22521  | 13.3 | 0.00091693 |
| ADH-2797    | chr2L      | 16345697 | 16346652 | 1.09445  | 6.07 | 0.00897571 |
| ADH-2988(AD | chr2L      | 14568287 | 14569224 | 0.691022 | 3.62 | 0.0361577  |
| ADH-3001(AD | chr2L      | 14705268 | 14706211 | 2.83217  | 15.2 | 0.0006187  |
| ADH-3002(AD | chr2L      | 14706282 | 14707212 | 3.82697  | 22.5 | 0.00019135 |
| ADH-588     | chr2L      | 14094282 | 14095204 | 2.63725  | 23.2 | 0.00017584 |
| ADH-654     | chr2L      | 14160253 | 14161204 | 1.77116  | 3.36 | 0.0436216  |
| ADH-655     | chr2L      | 14161307 | 14162232 | 1.63658  | 3.44 | 0.041357   |
| ADH-705     | chr2L      | 14211282 | 14212217 | 2.22337  | 5.32 | 0.012962   |
| ANT296      | chr3R      | 2585618  | 2586544  | 0.987768 | 5.81 | 0.0101641  |
| ANT297      | chr3R      | 2584663  | 2585607  | 1.58982  | 7.44 | 0.00502906 |
| ANT84       | chr3R      | 2798559  | 2799535  | 1.77878  | 11   | 0.00160632 |
| ANT87       | chr3R      | 2795586  | 2796536  | 1.30526  | 3.68 | 0.0346727  |
| as-c.47     | chrX       | 263822   | 264870   | 1.43281  | 3.77 | 0.0326912  |
| p9          | chr2R      | 4662349  | 4663340  | 0.640185 | 12   | 0.00124103 |
| UBX100      | chr3R      | 12708202 | 12709142 | 1.21269  | 7.21 | 0.00549684 |
| UBX113      | chr3R      | 12695177 | 12696103 | 0.794967 | 7.49 | 0.00492347 |
| UBX114      | chr3R      | 12694232 | 12695108 | 0.637737 | 4.98 | 0.0155894  |
| UBX126      | chr3R      | 12682224 | 12683124 | 0.484172 | 4.69 | 0.0183625  |
| UBX14       | chr3R      | 12795207 | 12796155 | 1.60864  | 5.09 | 0.0146823  |
| UBX148      | chr3R      | 12660219 | 12661106 | 0.659504 | 14.4 | 0.00072548 |
| UBX184      | chr3R      | 12624208 | 12625144 | 1.04212  | 6.92 | 0.00619822 |
| UBX49       | chr3R      | 12760178 | 12761088 | 1.36248  | 5.89 | 0.00978868 |
| UBX65       | chr3R      | 12744228 | 12745136 | 1.55948  | 7.72 | 0.00452192 |
