# Supplementary material
Source: PubMed Central journal article supplement (PMC1934388)
Supplement: pgen.0030112.st002.pdf [file pgen.0030112.st002.pdf]

|   |  |    |    |    |    |    |    |    |    |    |    |    |    |    |    |    |    |    |    |
|---|--|----|----|----|----|----|----|----|----|----|----|----|----|----|----|----|----|----|----|
| A |  | 6  | 5  | 11 | 7  | 5  | 9  | 14 | 2  | 26 | 1  | 9  | 0  | 0  | 0  | 0  | 0  | 1  |    |
| C |  | 14 | 8  | 4  | 16 | 22 | 4  | 11 | 14 | 0  | 0  | 1  | 1  | 0  | 0  | 29 | 1  | 28 | 11 |
| G |  | 2  | 16 | 10 | 5  | 2  | 13 | 5  | 1  | 4  | 28 | 19 | 8  | 30 | 23 | 0  | 28 | 0  | 3  |
| T |  | 8  | 1  | 5  | 2  | 1  | 4  | 0  | 13 | 0  | 1  | 1  | 21 | 0  | 7  | 1  | 1  | 2  | 15 |
